# Supplementary material for: A phosphoinositide-binding cluster in cavin1 acts as a molecular sensor for cavin1 degradation
Source: PubMed Central journal article supplement — Mol Biol Cell. 2015 Oct 15;26(20):3561–9. doi: 10.1091/mbc.E15-06-0359 (PMC4603927; doi:10.1091/mbc.e15-06-0359), 2015-10-15
Supplement: supp_E15-06-0359v1_CombinedSupMats.pdf [file supp_E15-06-0359v1_CombinedSupMats.pdf]

# Supplemental Materials

*Molecular Biology of the Cell*

Tillu et al.

## Supplementary Material

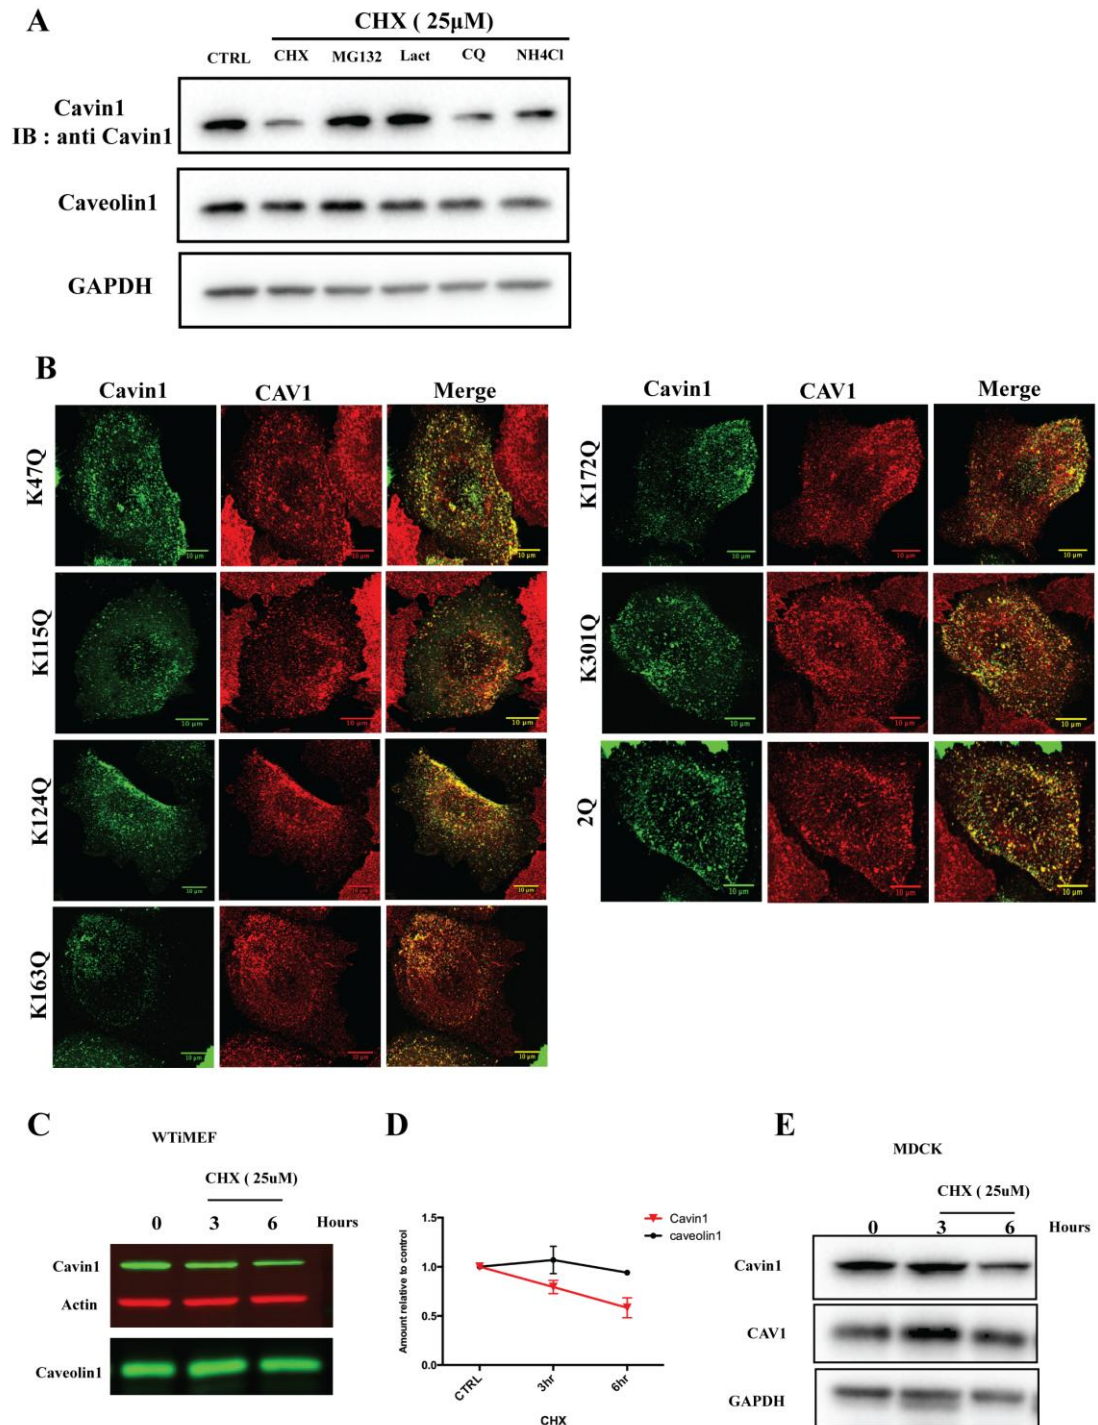

**Figure S1**

(A) A431 cells were treated with CHX (25 $\mu$ M) with or without specific inhibitors as mentioned for 6 h. Subsequently, cells were lysed in buffer A and immunoblotted for endogenous cavin1, CAV1, GAPDH. (B) Immunofluorescence analysis of lysine (K) to glutamine (Q) point mutants and their co localization with CAV1 in PC3 cells. PC3 cells were transfected with GFP tagged version of each point mutant of cavin1 depicted in Figure 2A and were immunolabelled for CAV1 with Alexa Fluor 555 secondary antibody (red). Scale bar – 10 $\mu$ m. CHX pulse chase analysis in WT

iMEF's(C), MDCK cells (E) and immublots for cavin1, CAV1, GAPDH and actin.  
(D) Quantification of total endogenous cavin1 and CAV1 levels from 2-3 independent experiments of CHX pluse chase analysis in WT iMEF's.

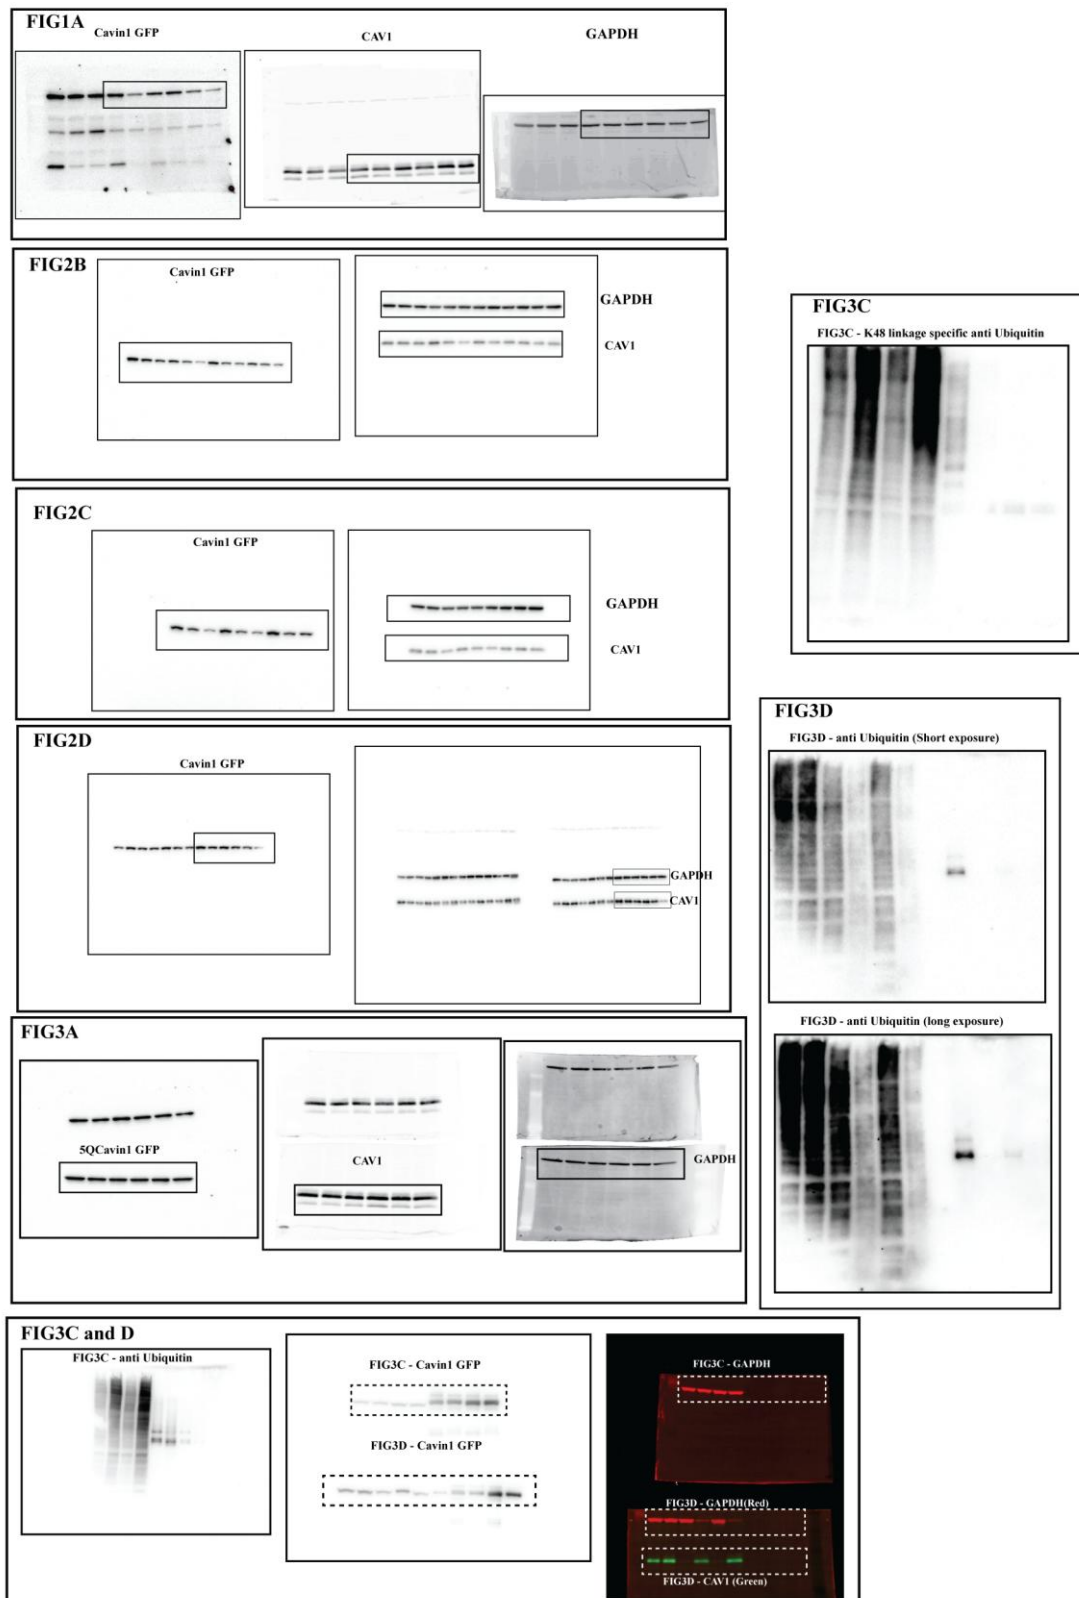

**Figure S2**

Uncropped images of western blots represented in main Figure 1,2 and 3.

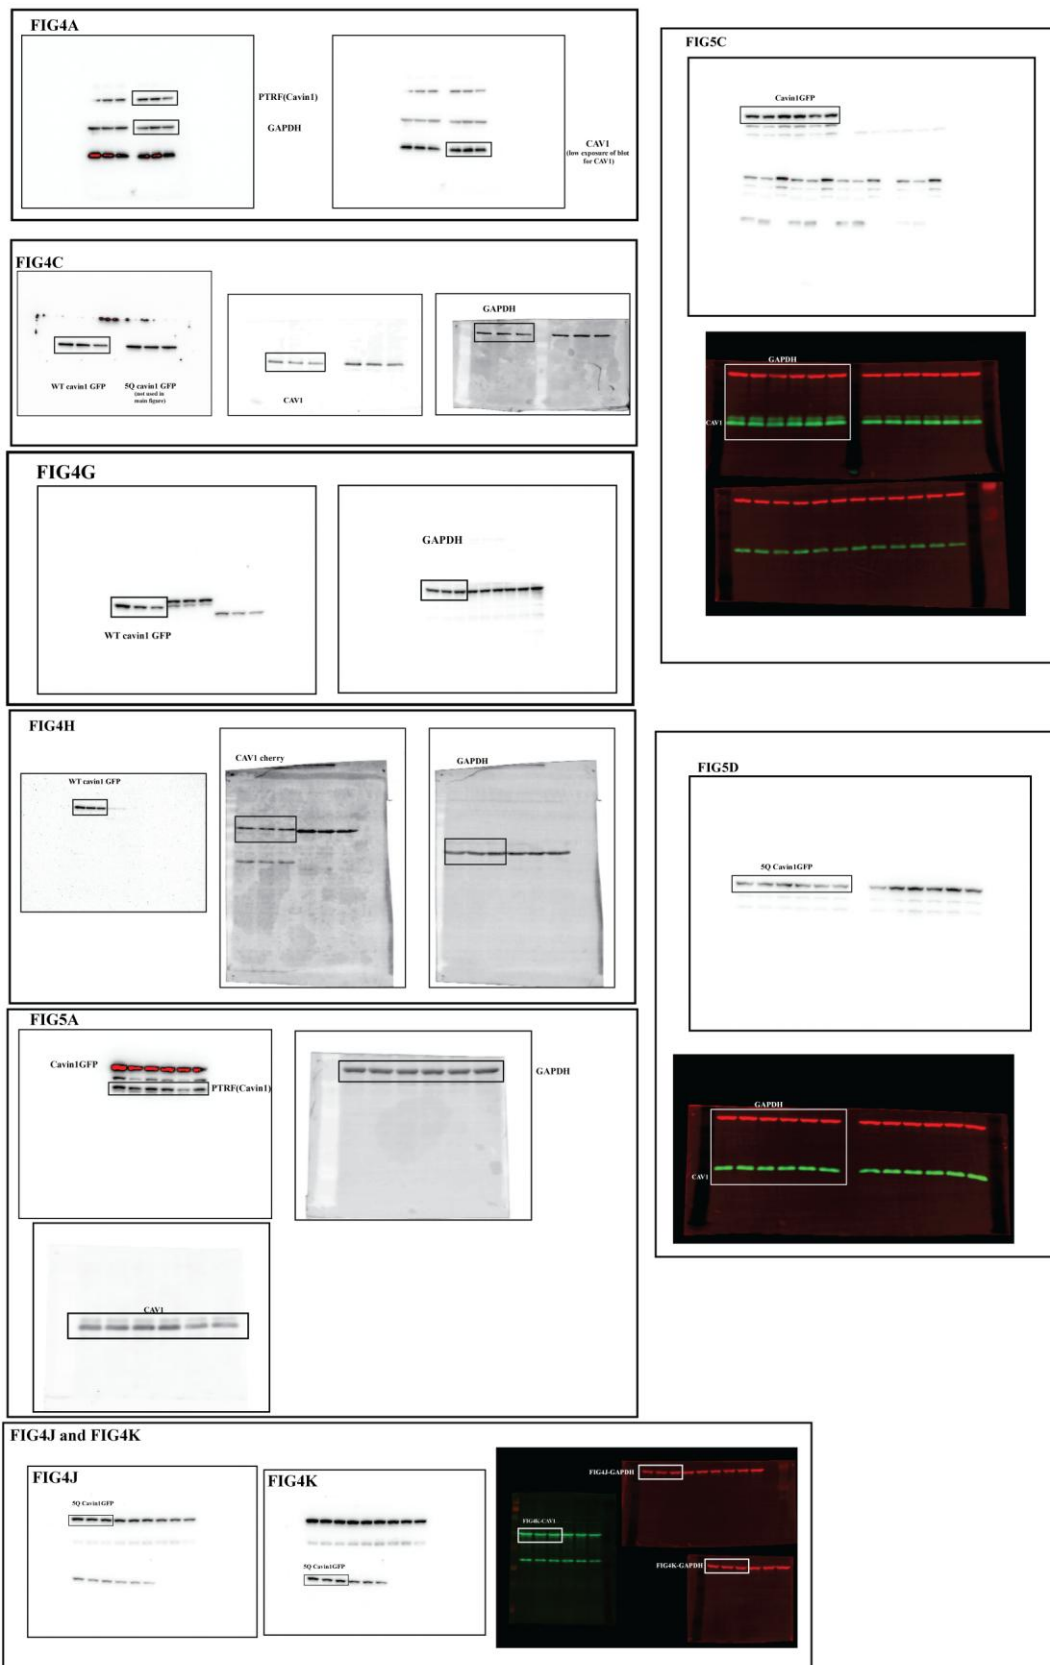

**Figure S3**

Uncropped images of western blots represented in main Figure 4 and 5.
